# Supplementary material for: A novel TLR7 agonist as adjuvant to stimulate high quality HBsAg-specific immune responses in an HBV mouse model
Source: J Transl Med. 2020 Mar 4;18:112. doi: 10.1186/s12967-020-02275-2 (PMC7055022; doi:10.1186/s12967-020-02275-2)
Supplement: Supplementary file 4 — Additional file 4: Table S3. Complete list of ISGs significantly downregulated by T7-EA compared to T7. ISGs were taken from Schoggins et al. (2011) Nature 472: 481-485. All genes had an absolute fold-change (FC) >2 and a false discovery rate (FDR) <0.05 in T7-EA vs T7 group, and passed a low-expression filter. [file 12967_2020_2275_MOESM4_ESM.xlsx]

## Sheet: DEGs in ISGs
Table S3. Complete list of ISGs significantly downregulated by T7-EA compared to T7. ISGs were taken from Schoggins et al. (2011) Nature 472: 481-485. All genes had an absolute fold-change (FC) >2 and a false discovery rate (FDR) <0.05 in T7-EA vs T7 group, and passed a low-expression filter.
Gene	Description_KEGG	T7 vs Mock		T7-EA vs Mock		T7-EA vs T7
		Log2 FC	FDR	Log2 FC	FDR	Log2 FC	FDR
Stat1	K11220//signal transducer and activator of transcription 1+ko04630//Jak-STAT signaling pathway+ko04933//AGE-RAGE signaling pathway in diabetic complications+ko04217//Necroptosis+ko04919//Thyroid hormone signaling pathway+ko04917//Prolactin signaling pathway+ko04658//Th1 and Th2 cell differentiation+ko04659//Th17 cell differentiation+ko04380//Osteoclast differentiation+ko04625//C-type lectin recep…	1.95659	0	0.773808	1.06e-91	-1.18279	0
Bst2	K06731//bone marrow stromal cell antigen 2	2.53527	0	1.43046	0	-1.10481	0
Usp18	K11846//ubiquitin carboxyl-terminal hydrolase 18/41 [EC:3.4.19.12]	5.00463	0	2.71511	9.89e-229	-2.28951	0
Rtp4	NA	5.03689	0	3.82204	0	-1.21486	1.53e-273
Hsh2d	K06069//atypical protein kinase C iota type [EC:2.7.11.13]+ko04391//Hippo signaling pathway - fly+ko04390//Hippo signaling pathway+ko04144//Endocytosis+ko04910//Insulin signaling pathway+ko04611//Platelet activation+ko04530//Tight junction+ko04015//Rap1 signaling pathway+ko05165//Human papillomavirus infection;K08273//SH2 domain protein 2A+ko04370//VEGF signaling pathway	3.02313	2.84e-11	0.873756	0.0984273	-2.14938	1.4e-07
Phf11b	K18494//histone-lysine N-methyltransferase SETDB2 [EC:2.1.1.43]+ko00310//Lysine degradation	2.29001	7.6e-120	0.798202	3.36e-10	-1.49181	2.67e-67
Ifnb1	K05415//interferon beta+ko04630//Jak-STAT signaling pathway+ko04217//Necroptosis+ko04650//Natural killer cell mediated cytotoxicity+ko04380//Osteoclast differentiation+ko04668//TNF signaling pathway+ko05142//Chagas disease (American trypanosomiasis)+ko04621//NOD-like receptor signaling pathway+ko04620//Toll-like receptor signaling pathway+ko04623//Cytosolic DNA-sensing pathway+ko04622//RIG-I-like…	4.05997	3.93e-05	-0.0193292	0.411394	-4.0793	0.000136008
Ifi44l	NA	5.77228	0	2.64446	1.48e-170	-3.12782	0
Ifit1	K14217//interferon-induced protein with tetratricopeptide repeats 1+ko05160//Hepatitis C+ko05168//Herpes simplex infection	5.15016	0	2.08359	1.55e-19	-3.06657	6.01e-233
Phf11a	K18494//histone-lysine N-methyltransferase SETDB2 [EC:2.1.1.43]+ko00310//Lysine degradation	1.95264	2.48e-15	0.952419	0.000804799	-1.00022	5.25e-06
Ube2l6	K04553//ubiquitin-conjugating enzyme E2 L6 [EC:2.3.2.23]+ko04120//Ubiquitin mediated proteolysis+ko05012//Parkinson's disease	1.57843	6.89e-156	0.563929	1.66e-15	-1.01451	1.11e-78
Parp12	K15259//poly [ADP-ribose] polymerase 7/11/12/13 [EC:2.4.2.30]	1.54488	0	0.535204	9.77e-52	-1.00968	0
Isg20	K12579//interferon-stimulated gene 20 kDa protein [EC:3.1.13.1]	5.54597	4.55e-234	3.29571	3.02e-39	-2.25026	2.18e-121
Irf7	K09447//interferon regulatory factor 7+ko04621//NOD-like receptor signaling pathway+ko04620//Toll-like receptor signaling pathway+ko04623//Cytosolic DNA-sensing pathway+ko04622//RIG-I-like receptor signaling pathway+ko05203//Viral carcinogenesis+ko05161//Hepatitis B+ko05160//Hepatitis C+ko05162//Measles+ko05164//Influenza A+ko05167//Kaposi's sarcoma-associated herpesvirus infection+ko05168//Herpe…	5.90361	0	4.2286	0	-1.67501	0
Cxcl10	K12671//C-X-C motif chemokine 10+ko04657//IL-17 signaling pathway+ko04668//TNF signaling pathway+ko04620//Toll-like receptor signaling pathway+ko04623//Cytosolic DNA-sensing pathway+ko04622//RIG-I-like receptor signaling pathway+ko04062//Chemokine signaling pathway+ko04060//Cytokine-cytokine receptor interaction+ko05164//Influenza A	2.95835	6.76e-84	0.228598	0.173192	-2.72975	5.62e-77
Ifit2	K14217//interferon-induced protein with tetratricopeptide repeats 1+ko05160//Hepatitis C+ko05168//Herpes simplex infection	2.2	0	0.0126305	0.378127	-2.18737	0
Trafd1	NA	1.93076	0	0.927138	3.15e-92	-1.00362	9.42e-210
Gbp3	K20899//guanylate-binding protein 1/3/4/7+ko04621//NOD-like receptor signaling pathway	4.15212	2.51e-32	2.01012	5.56e-05	-2.14199	2.5e-17
Ifih1	K12647//interferon-induced helicase C domain-containing protein 1 [EC:3.6.4.13]+ko04622//RIG-I-like receptor signaling pathway+ko05161//Hepatitis B+ko05162//Measles+ko05164//Influenza A+ko05168//Herpes simplex infection	3.60323	0	2.21214	7.99e-202	-1.39109	3.54e-279
Ifit3b	K14217//interferon-induced protein with tetratricopeptide repeats 1+ko05160//Hepatitis C+ko05168//Herpes simplex infection	4.84345	5.68e-47	-1.60429	0.0651392	-6.44774	4.53e-47
Gbp2b	K20897//guanylate-binding protein 2+ko04621//NOD-like receptor signaling pathway	1.8794	0.00020247	-2.01933	0.0279882	-3.89872	4.12e-07
Herc6	K22372//E3 ubiquitin-protein ligase HERC5/6 [EC:2.3.2.-]	2.24463	1.37e-167	1.00383	3.04e-23	-1.2408	5.39e-73
Ifi203	K20914//gamma-interferon-inducible protein 16+ko04621//NOD-like receptor signaling pathway	1.77028	6.56e-263	0.556214	1.37e-18	-1.21407	1.14e-150
Zbp1	K12965//Z-DNA binding protein 1+ko04217//Necroptosis+ko04623//Cytosolic DNA-sensing pathway	8.78903	0	6.33571	3.14e-134	-2.45332	0
Trim21	K10651//tripartite motif-containing protein 21 [EC:2.3.2.27]+ko05322//Systemic lupus erythematosus	1.16964	1.8e-37	0.13733	0.109107	-1.03231	3.21e-30
Ifi202b	K12971//interferon-activable protein 202+ko04623//Cytosolic DNA-sensing pathway;K20914//gamma-interferon-inducible protein 16+ko04621//NOD-like receptor signaling pathway	6.01414	0	4.66293	4.17e-133	-1.35121	2.81e-90
Ifi44	NA	4.58267	0	2.50099	0	-2.08169	0
Cfb	K01335//component factor B [EC:3.4.21.47]+ko04610//Complement and coagulation cascades+ko05150//Staphylococcus aureus infection	2.0945	6.34e-18	0.893208	0.00186948	-1.20129	2.81e-08
Phf11d	K18494//histone-lysine N-methyltransferase SETDB2 [EC:2.1.1.43]+ko00310//Lysine degradation	2.89088	0	1.30006	1.95e-95	-1.59082	0
Parp14	K15261//poly [ADP-ribose] polymerase 10/14/15 [EC:2.4.2.30]	2.99698	0	1.66754	2.48e-275	-1.32944	0
Ifi204	K20914//gamma-interferon-inducible protein 16+ko04621//NOD-like receptor signaling pathway;K12971//interferon-activable protein 202+ko04623//Cytosolic DNA-sensing pathway	3.34009	0	1.73512	8.68e-84	-1.60497	2.81e-226
Slc22a29	K08206//MFS transporter, OCT family, solute carrier family 22 (organic anion/cation transporter), member 9/10/19/24/25	3.6617	7.21e-15	1.95082	0.0013907	-1.71087	1.12e-06
Ifit3	K14217//interferon-induced protein with tetratricopeptide repeats 1+ko05160//Hepatitis C+ko05168//Herpes simplex infection	5.70751	2.87e-212	2.03933	3.59e-09	-3.66818	3.36e-178
Isg15	K12159//ubiquitin cross-reactive protein+ko04622//RIG-I-like receptor signaling pathway+ko05165//Human papillomavirus infection	6.94017	0	4.33508	1.26e-169	-2.60509	0
Ifit1bl2	K14217//interferon-induced protein with tetratricopeptide repeats 1+ko05160//Hepatitis C+ko05168//Herpes simplex infection	1.23606	3.72e-06	-0.347442	0.163896	-1.5835	1.27e-07
Trim34b	K11999//tripartite motif-containing protein 6/22/34	2.72454	6.97e-28	1.43632	3.02e-06	-1.28822	1.27e-10
Ccl2	K14624//C-C motif chemokine 2+ko04933//AGE-RAGE signaling pathway in diabetic complications+ko05418//Fluid shear stress and atherosclerosis+ko04657//IL-17 signaling pathway+ko04668//TNF signaling pathway+ko05144//Malaria+ko05142//Chagas disease (American trypanosomiasis)+ko04621//NOD-like receptor signaling pathway+ko05323//Rheumatoid arthritis+ko04062//Chemokine signaling pathway+ko04060//Cytoki…	4.90849	8.59e-127	2.28648	1.36e-12	-2.62201	4.34e-80
Aqp9	K09877//aquaporin-9+ko04976//Bile secretion	7.8993	6.15e-154	6.55053	3.94e-67	-1.34877	4.91e-44
Xaf1	NA	4.00952	0	2.51824	6.2e-123	-1.49128	6.06e-173
Parp10	K15261//poly [ADP-ribose] polymerase 10/14/15 [EC:2.4.2.30]	1.80385	0	0.678201	3.26e-33	-1.12565	2.7e-164
Trim30a	K10648//tripartite motif-containing protein 5 [EC:2.3.2.27]	4.23132	0	2.78884	0	-1.44248	0
Epsti1	K10433//microtubule-associated protein 7	2.69132	0	1.25048	8.02e-49	-1.44085	4.28e-161
Tnfsf13b	K05476//tumor necrosis factor ligand superfamily member 13B+ko05323//Rheumatoid arthritis+ko04672//Intestinal immune network for IgA production+ko04060//Cytokine-cytokine receptor interaction+ko04064//NF-kappa B signaling pathway	-0.605205	6.21e-05	-1.63904	7.9e-19	-1.03384	1.46e-06
Ddx58	K12646//ATP-dependent RNA helicase DDX58 [EC:3.6.3.14]+ko04623//Cytosolic DNA-sensing pathway+ko04622//RIG-I-like receptor signaling pathway+ko04064//NF-kappa B signaling pathway+ko05161//Hepatitis B+ko05160//Hepatitis C+ko05162//Measles+ko05164//Influenza A+ko05169//Epstein-Barr virus infection+ko05168//Herpes simplex infection	3.58996	0	2.2416	0	-1.34835	0
Batf2	K09034//ATF-like basic leucine zipper transcriptional factor	1.60993	3.03e-10	0.395708	0.110492	-1.21423	1.28e-06
Lgals9	K10093//galectin-9	4.68206	0	3.27918	0	-1.40288	0
Stat2	K11221//signal transducer and activator of transcription 2+ko04630//Jak-STAT signaling pathway+ko04217//Necroptosis+ko04380//Osteoclast differentiation+ko04625//C-type lectin receptor signaling pathway+ko04621//NOD-like receptor signaling pathway+ko05200//Pathways in cancer+ko04062//Chemokine signaling pathway+ko05161//Hepatitis B+ko05160//Hepatitis C+ko05162//Measles+ko05165//Human papillomaviru…	1.22356	1.45e-182	0.0942257	0.0389738	-1.12934	6.02e-161
